# Supplementary material for: Chronic unpredictable mild stress promotes atherosclerosis via adipose tissue dysfunction in ApoE-/- mice
Source: PeerJ journal article supplement (doi:10.7717/peerj.16029), 2023-09-04

ACC(277KD)

Con CUMS  
1 2 3 1 2 3

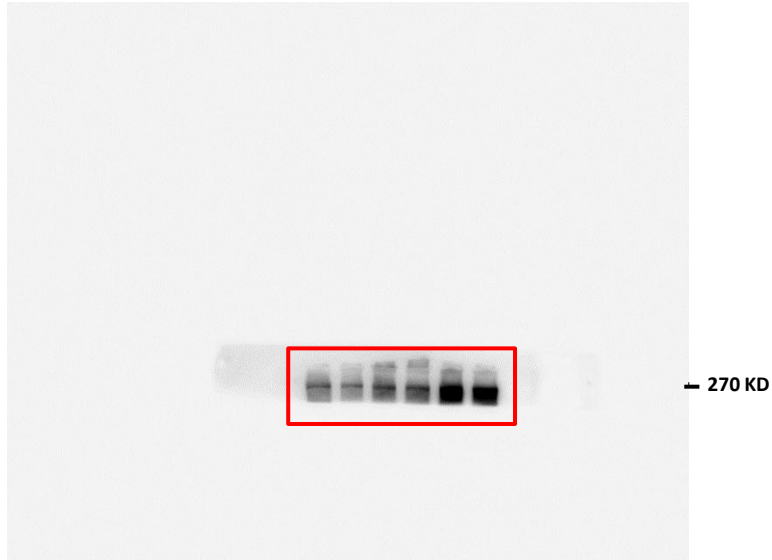

$\beta$ -actin(43KD)

Con CUMS  
1 2 3 1 2 3

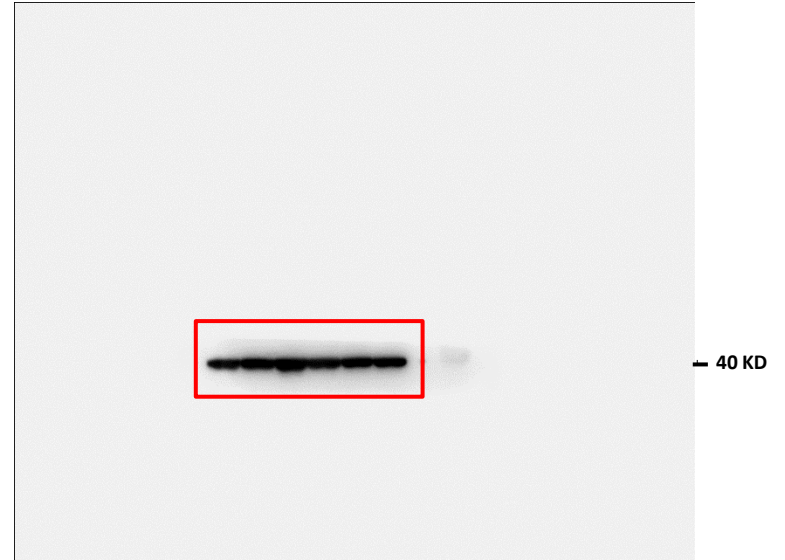

Con CUMS  
4 5 4 5

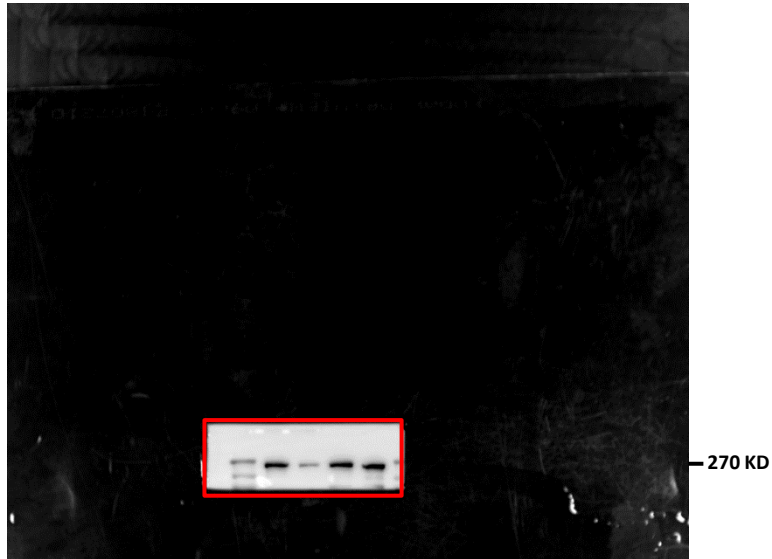

Con CUMS  
4 5 4 5

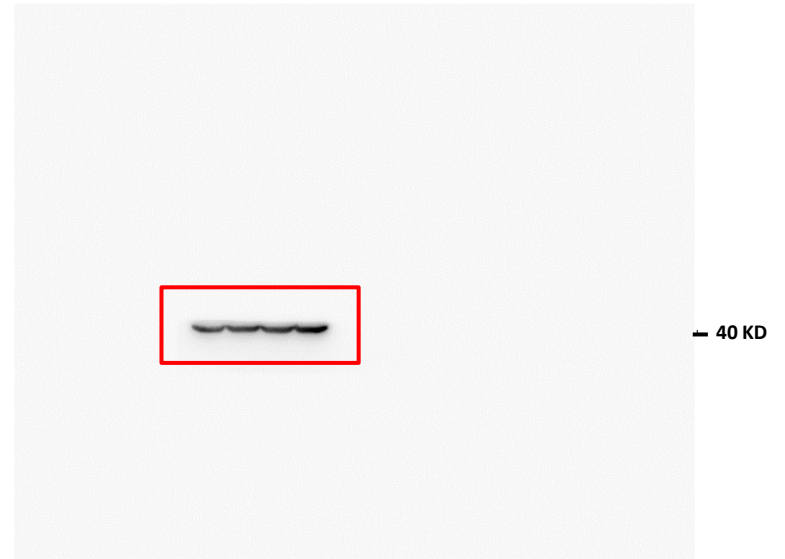

FAS(273KD)

Con CUMS  
1 2 3 1 2 3

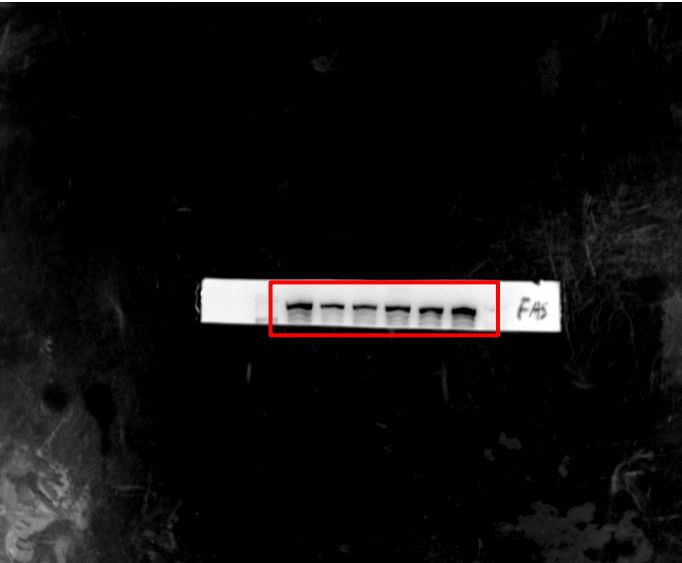

270 KD

$\beta$ -actin(43KD)

Con CUMS  
1 2 3 1 2 3

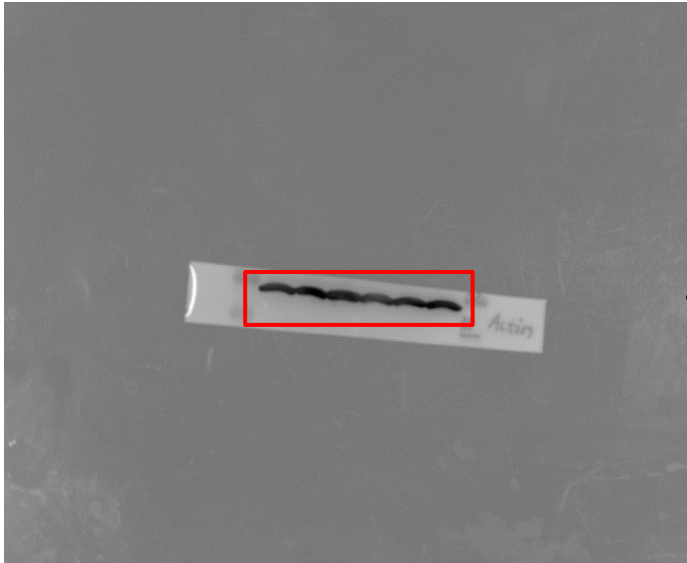

45 KD  
35 KD

Con CUMS  
4 5 4 5

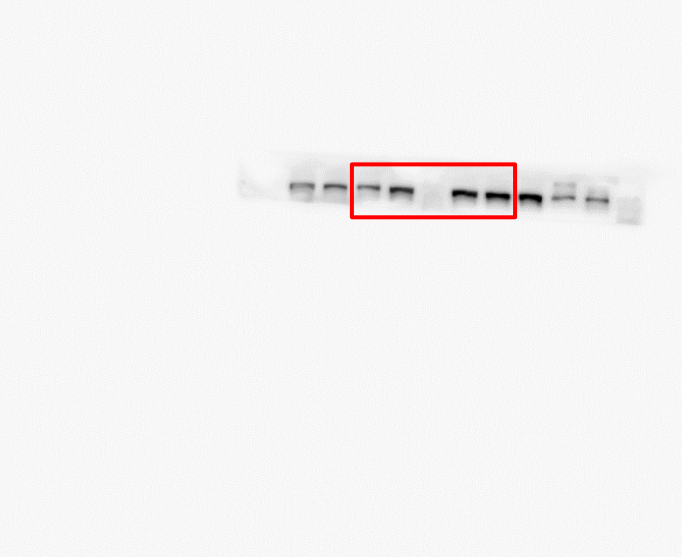

270 KD

Con CUMS  
4 5 4 5

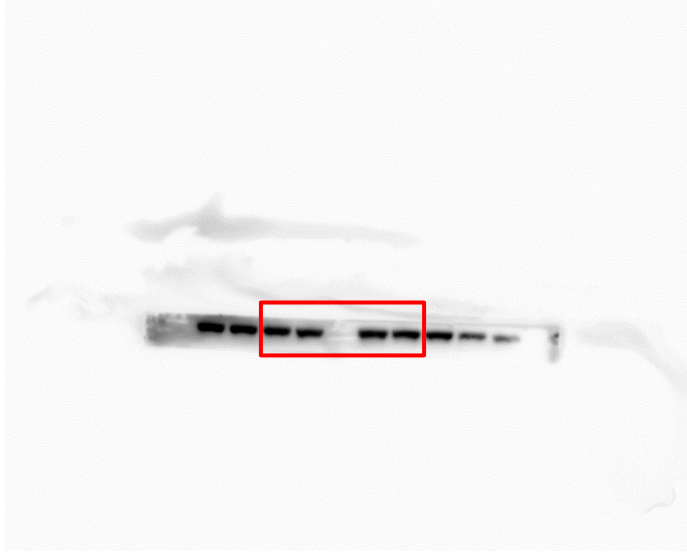

45 KD

ATGL(55KD)

Con CUMS  
1 2 3 1 2 3

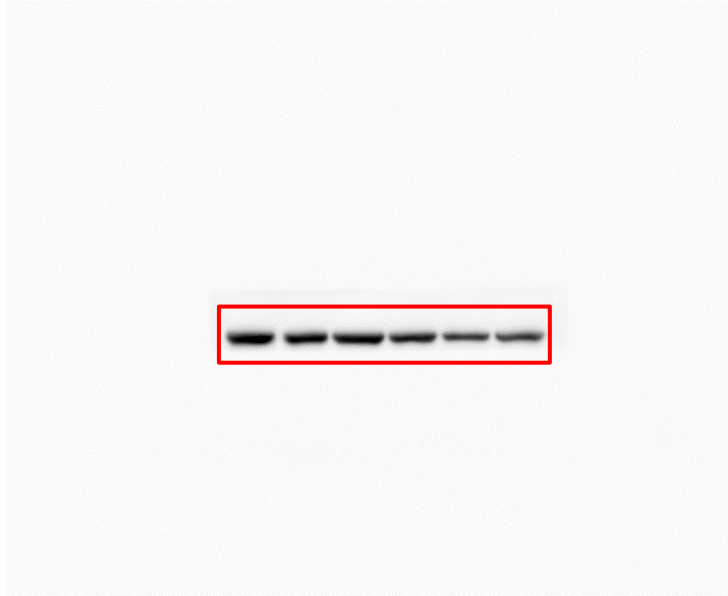

← 55 KD

$\beta$ -actin(43KD)

Con CUMS  
1 2 3 1 2 3

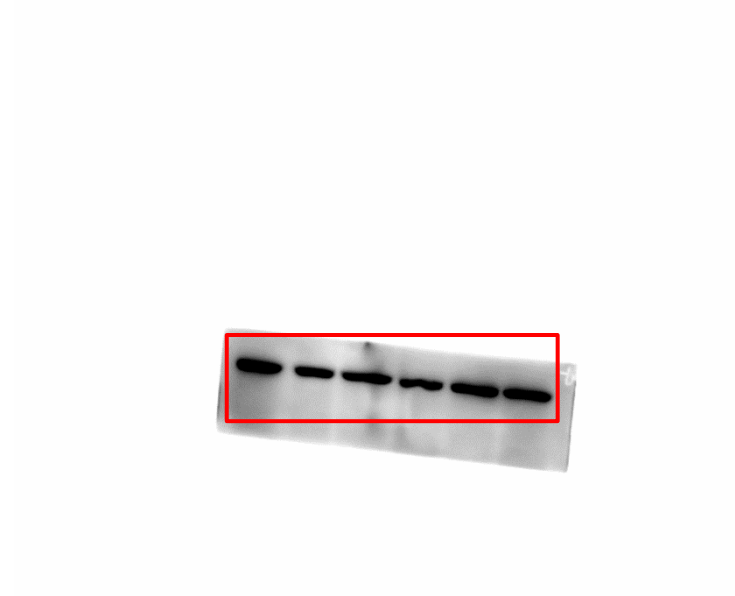

← 40 KD

Con CUMS  
4 5 4 5

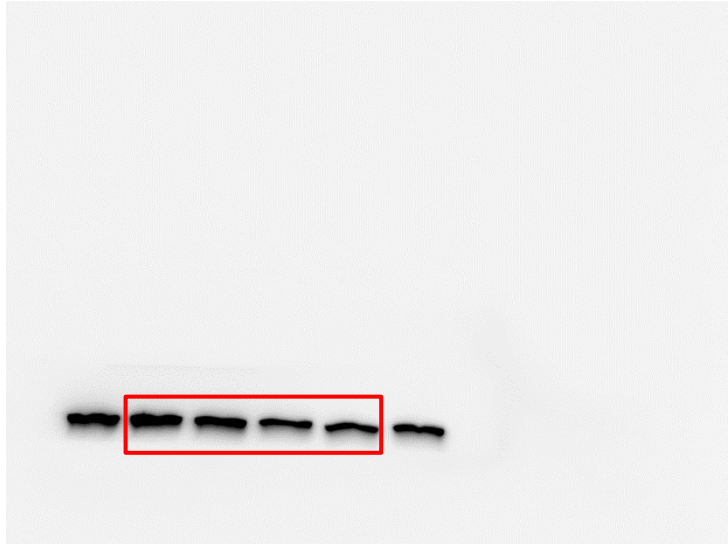

← 55 KD

Con CUMS  
4 5 4 5

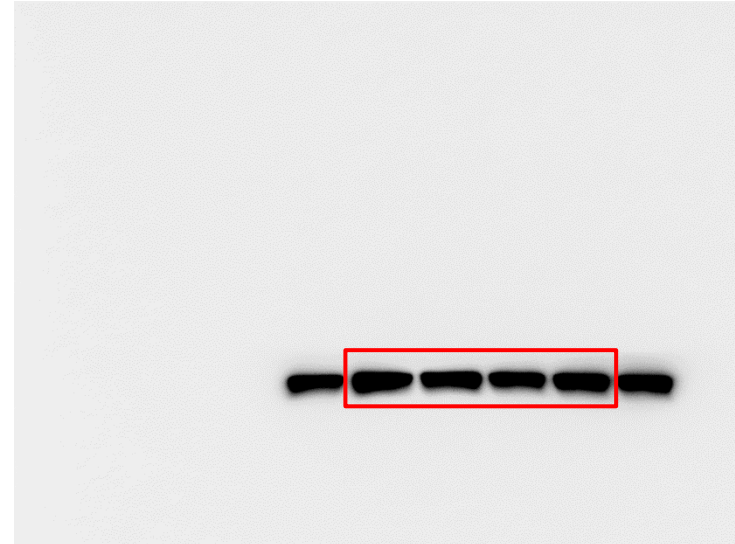

← 40 KD

p-HSL(82KD)

Con CUMS  
1 2 1 2

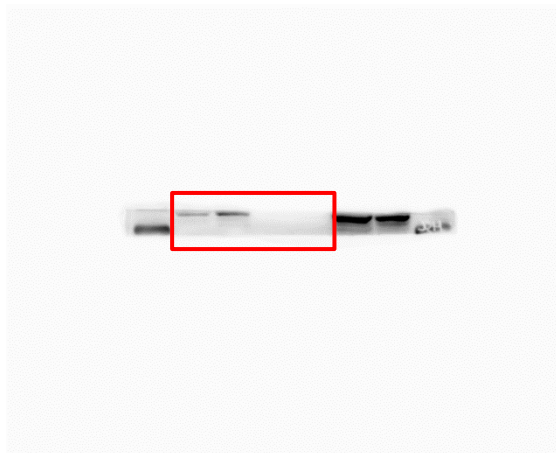

HSL(82KD)

Con CUMS  
1 2 1 2

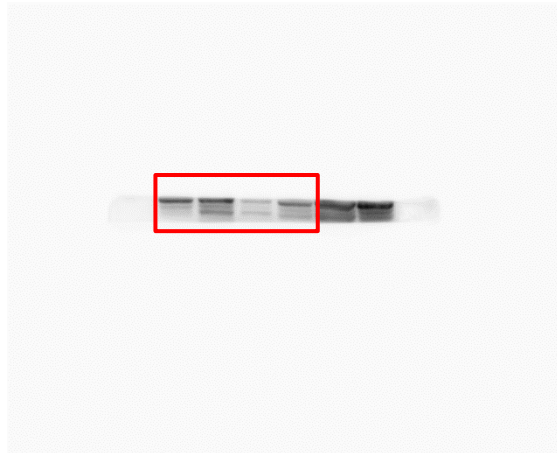

$\beta$ -actin(43KD)

Con CUMS  
1 2 1 2

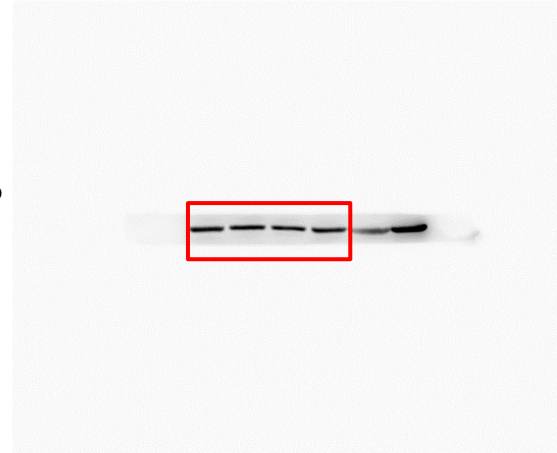

Con CUMS  
3 4 5 3 4 5

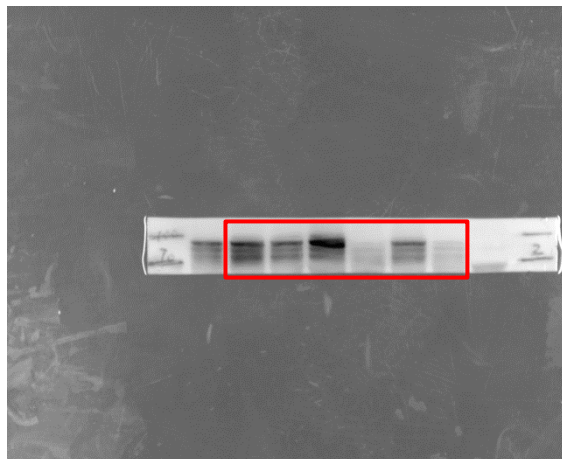

Con CUMS  
3 4 5 3 4 5

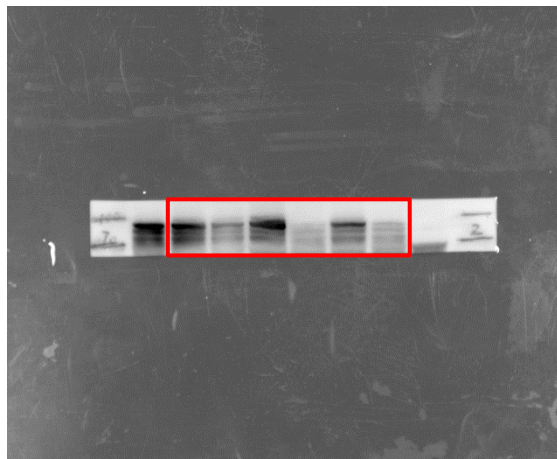

Con CUMS  
3 4 5 3 4 5

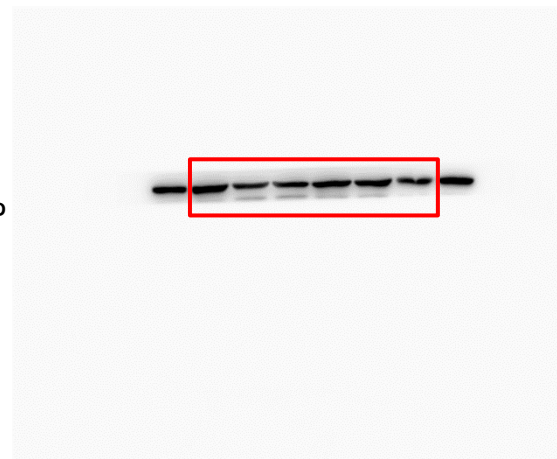

# p-AKT(60KD)

Con      CUMS  
1 2 3    1 2 3

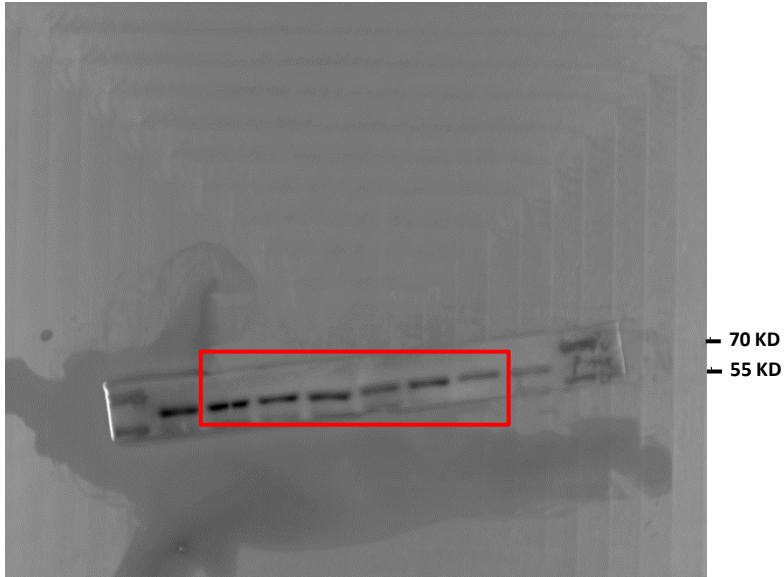

# AKT(60KD)

Con      CUMS  
1 2 3    1 2 3

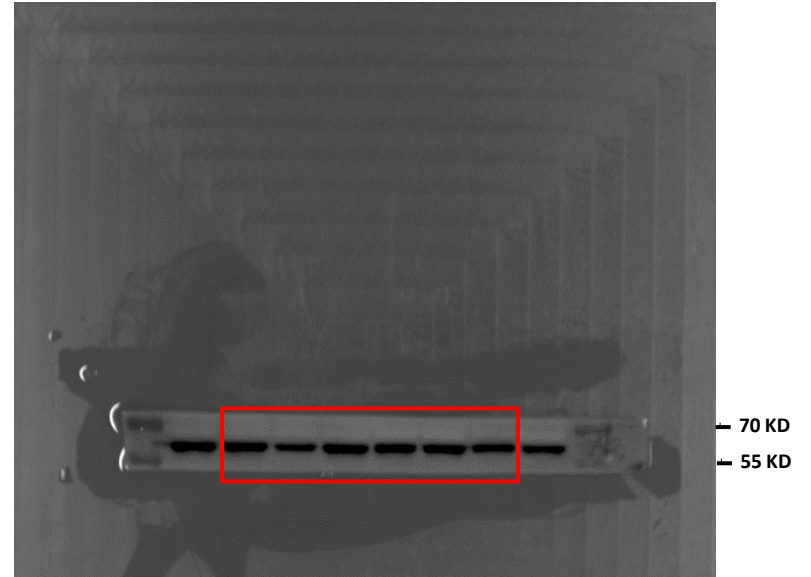

Con      CUMS  
4 5    4 5

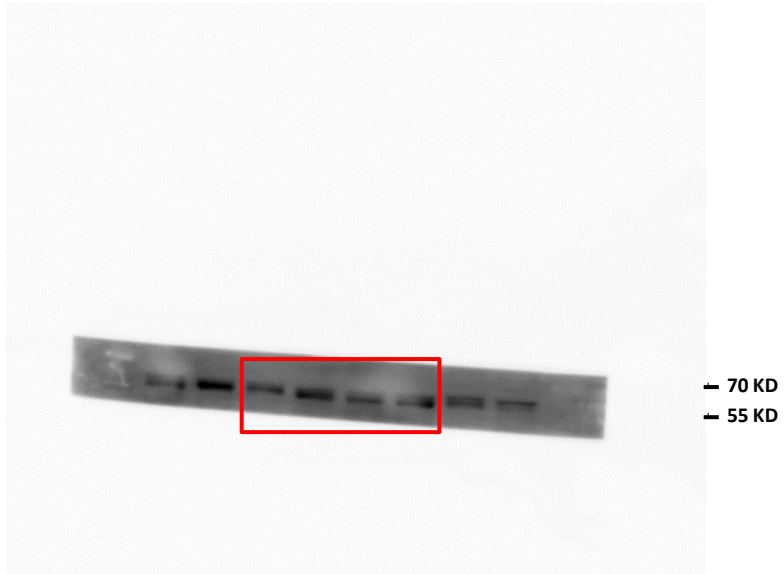

Con      CUMS  
4 5    4 5

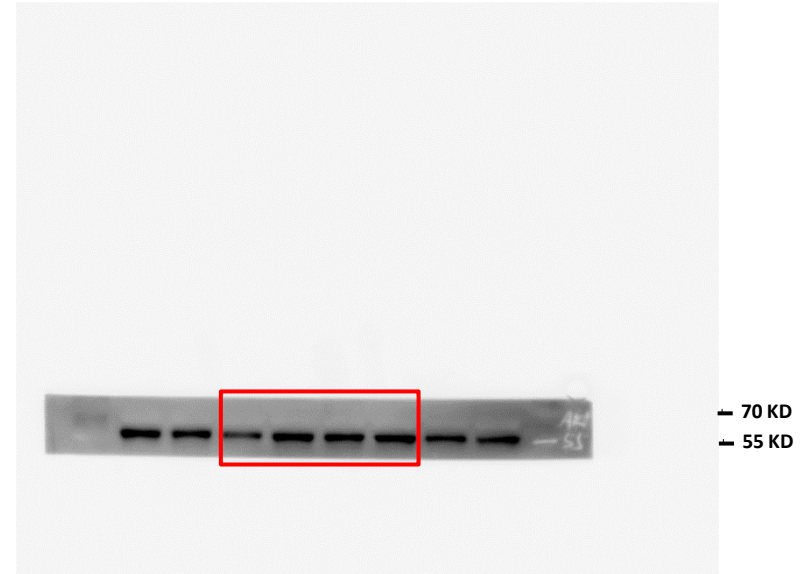

# GLUT4(54KD)

Con CUMS  
1 2 3 1 2 3

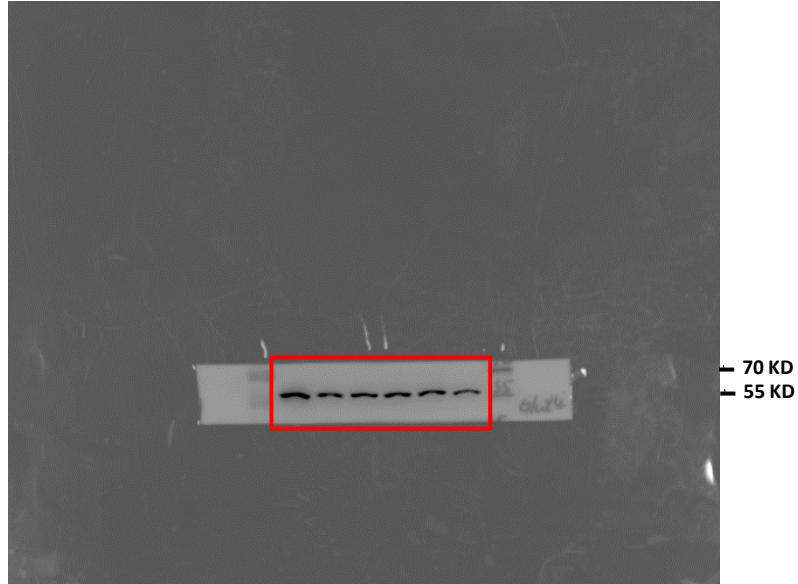

# $\beta$ -actin(43KD)

Con CUMS  
1 2 3 1 2 3

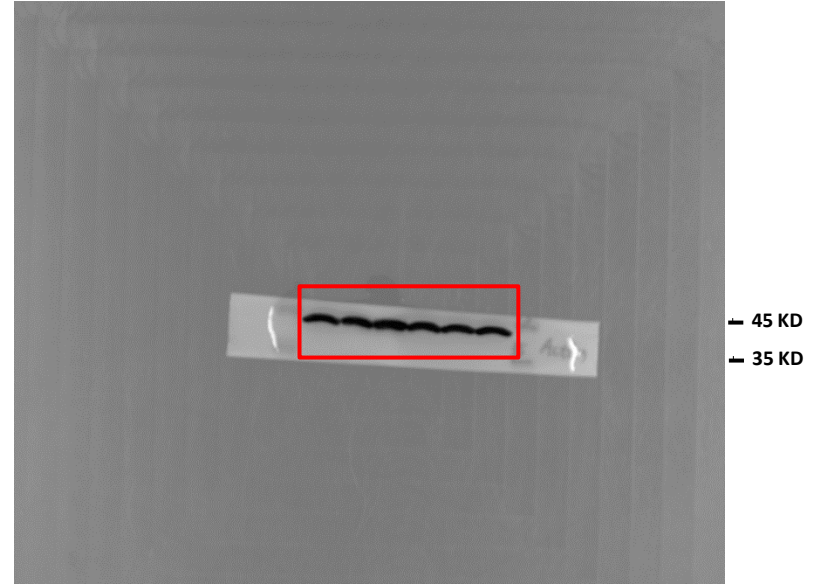

Con CUMS  
4 5 4 5

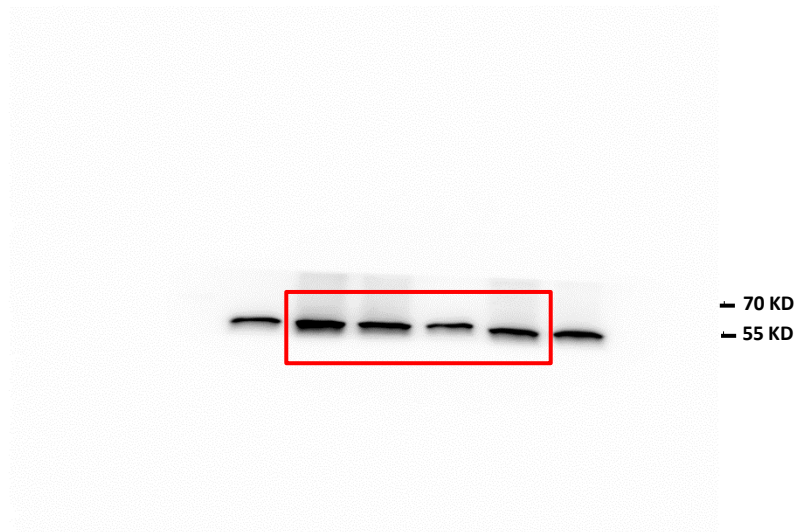

Con CUMS  
4 5 4 5

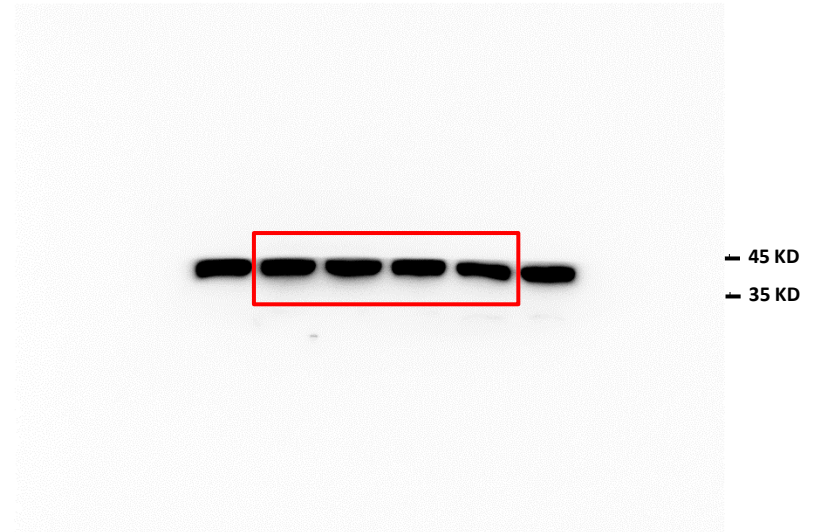

ABCA1(220KD)

ABCG1(100KD)

ApoA1(25KD)

$\beta$ -actin(43KD)

| Con |   | CUMS |   |
|-----|---|------|---|
| 1   | 2 | 1    | 2 |

| Con |   | CUMS |   |
|-----|---|------|---|
| 1   | 2 | 1    | 2 |

| Con |   | CUMS |   |
|-----|---|------|---|
| 1   | 2 | 1    | 2 |

| Con |   | CUMS |   |
|-----|---|------|---|
| 1   | 2 | 1    | 2 |

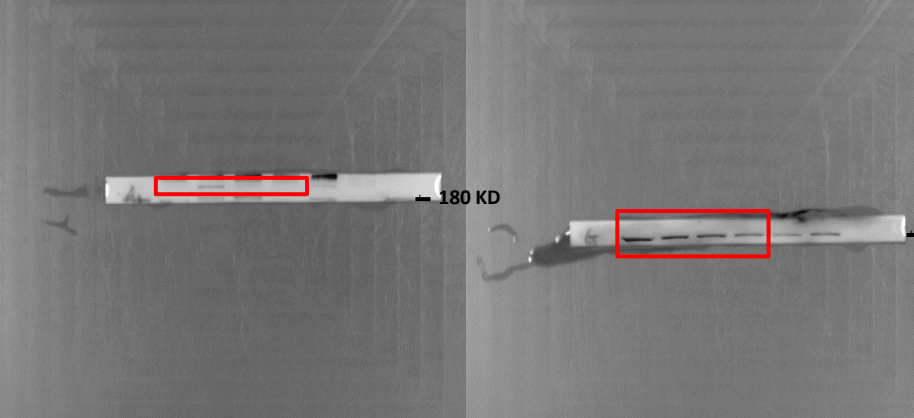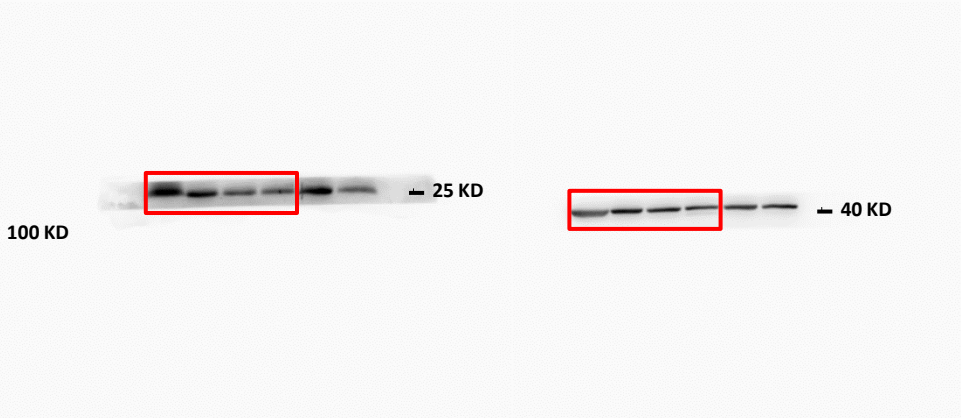

| Con |   |   | CUMS |   |   |
|-----|---|---|------|---|---|
| 3   | 4 | 5 | 3    | 4 | 5 |

| Con |   |   | CUMS |   |   |
|-----|---|---|------|---|---|
| 3   | 4 | 5 | 3    | 4 | 5 |

| Con |   |   | CUMS |   |   |
|-----|---|---|------|---|---|
| 3   | 4 | 5 | 3    | 4 | 5 |

| Con |   |   | CUMS |   |   |
|-----|---|---|------|---|---|
| 3   | 4 | 5 | 3    | 4 | 5 |

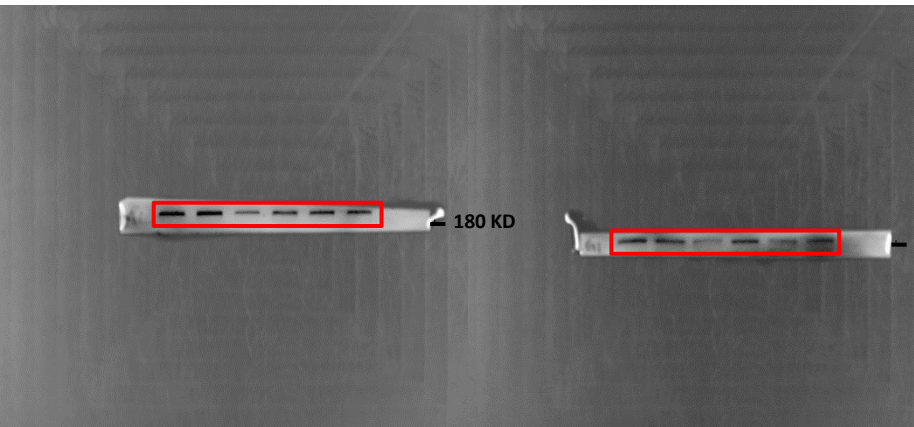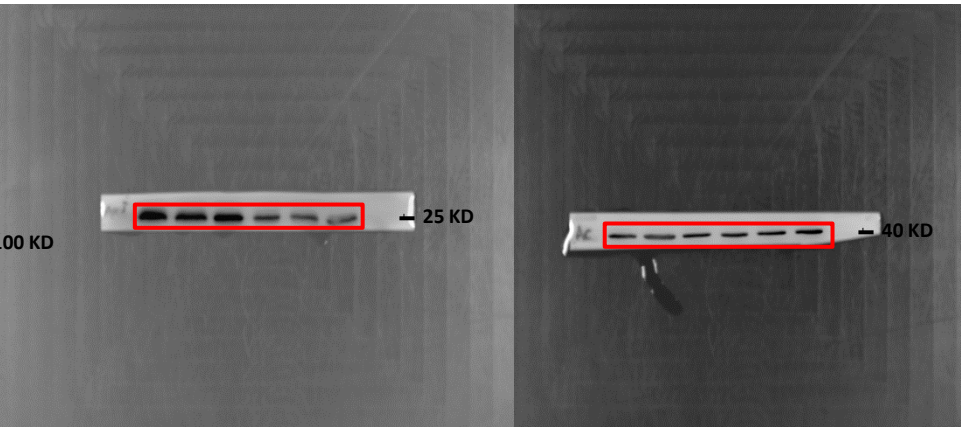

Supplement: WB_Raw_Data.pdf [file WB_Raw_Data.pdf]
