# Supplementary material for: Chronic unpredictable mild stress promotes atherosclerosis via adipose tissue dysfunction in ApoE-/- mice
Source: PeerJ. 2023 Sep 4;11:e16029. doi: 10.7717/peerj.16029 (PMC10484201; doi:10.7717/peerj.16029)
Supplement: Supplemental Information 4 [file peerj-11-16029-s004.xlsx]

## Sheet: Figure1
Figure 1A			Figure 1E			Figure 1G
Con	CUMS		Con	CUMS		Con	CUMS
6548.89	3328.29		0.104478	0.83871		2.74	1.91
7147.36	4955.69		0.619048	0.866667		2.72	2.56
5454.46	4573.06		0.1	0.818182		2.93	2.02
6753.33	5564.63		0.208333	0.684211		2	1.9
7794.73	6577.3		0.333333	0.642857		2.32	1.96
6422.45	4030.75		0.36	0.875		2.58	2.13
11184.3	4198.48		0.428571	0.783784		3.24	2.55
6400.71	4075.26		0.277778	0.741935		3.34	2.83
Figure 1B			Figure 1F			Figure 1H
Con	CUMS		Con	CUMS		Con	CUMS
33.3333	27.4194		7.5496	20.2625		12.31	15.4
27.2727	22.2222		9.2368	21.9283		13.61	14.34
34.7826	28.5714		8.5874	17.0873		13.21	15.97
39.0476	25.4902					14.97	15.22
31.9444	20.8333					15.22	14.56
34.6154	28.5714					14.47	16.01
42.8571	34.2857					12.08	13.97
32.6087	29.5652					11.51	14.44
Figure 1C						Figure 1I
Con	CUMS					Con	CUMS
13.1947	12.077					34.77	28.83
10.9236	15.7566					24.6	32.3
11.79	13.1279					29.96	26.9
20.0668	9.0366					24.3	23.48
13.431	16.2155					23.38	19.19
						23.45	24.11
Figure 1D						31.46	32.84
Con	CUMS					36.13	30.94
3.08465	3.08465
2.57062	3.58677					Figure 1J
2.51086	2.71407					Con	CUMS
2.8336	3.06074					0.48	0.73
2.41523	2.40328					0.8	0.64
2.4989	2.91728					0.7	0.72
2.46305	2.03275					0.84	0.5
2.82165	2.43914					0.7	0.58
						0.54	0.65
						0.57	0.72
						0.73	0.83

## Sheet: Figure2
Figure 2A
Con	CUMS
31.69	28.94
28.94	27.76
33.37	26.06
30.8	29.43
29.62	25.84
30.6	29.29
35	31.3
29.51	28.1
Figur 2B
	Con								CUMS
eWAT/BW	0.021083	0.024516	0.020788	0.025383	0.015962	0.022299	0.022703	0.019024	0.019682	0.022053	0.026617	0.028818	0.026226	0.022593	0.031359	0.029962
iWAT/BW	0.0204	0.0239	0.0102	0.0205	0.0274	0.02	0.0175	0.0196	0.0272	0.0294	0.0355	0.0277	0.031	0.0351	0.0191	0.0237
WAT/BW	0.0415	0.0484	0.0215	0.0553	0.0413	0.0395	0.0335	0.0528	0.0469	0.0514	0.0621	0.0566	0.0573	0.0704	0.0417	0.0417
Figure 2C
Con	CUMS
50	46
49	52
53	45
48	54
48	42
55	44
46	39
52	47
Figure 2D
Con	CUMS
118	75
105	83
120	85
71	69
107	69
103	74
82	64
91	71
Figure 2E
	Con					CUMS
Pparg	1.04085	0.930667	0.985843	1.28631	0.756322	0.341905	0.963921	0.82546	0.482771	0.346964
Slc2a4	0.732731	1.12946	1.07948	1.09594	0.962388	0.606061	0.96019	0.699643	0.633452	0.85428
Adipoq	1.2012	1.12335	1.01947	0.964473	0.691505	0.597832	0.645197	0.802178	0.416911	0.557797
Plin1	0.882051	0.842846	1.0417	1.13992	1.09349	0.880774	0.646723	0.525295	0.646257	0.696604

## Sheet: Figure3
Figure 3A			Figure 3B
Con	CUMS		Con	CUMS
1.35704	1.80424		1.04771	1.23932
1.14976	0.855458		0.802963	1.56987
0.780678	2.97414		1.14933	1.53262
1.03617	4.82831		1.21809	1.19051
0.676357	2.70345		0.89095	1.48934
Figure 3C			Figure 3D
Con	CUMS		Con	CUMS
1.51986	2.08824		1.22792	1.12732
2.04289	3.37669		0.892127	1.25093
0.31043	1.57895		0.879957	1.55303
0.562103	3.43969		1.08256	1.16288
0.564724	2.30517		0.95872	1.22781
Figure 3E			Figure 3F
Con	CUMS		Con	CUMS
0.963425	0.276688		1.21877	0.493355
0.850397	0.192589		0.95613	0.25062
0.846246	0.485801		0.825099	0.339131
0.920179	0.853086		1.12012	0.684043
1.41975	0.718139		0.93994	0.457316
Figure 3G			Figure 3H
			Left		Right
Con	CUMS		Control	CUMS	Con	CUMS
0.975732	0.651714		0.793344	0.459991	0.788221	0.198525
0.693415	0.60493		1.21014	0.904605	1.20983	0.152439
0.769253	0.387003		0.908456	0.751378	1.26518	0.204678
1.16655	0.422422		1.09817	0.740515	0.741787	0.270368
1.39505	0.661426		0.996922	0.499445	0.994727	0.297619

## Sheet: Figure4
Figure 4B
Left		Middle		Right
Con	CUMS	Con	CUMS	Con	CUMS
0.428116	1.06736	1.08533	0.993859	1.07029	0.687856
1.58247	0.842778	0.905384	0.712801	0.923108	0.813717
0.695652	0.786445	0.857143	0.539568	0.946392	0.523334
1.19048	0.400375	1.36054	0.731982	1.01111	0.637264
1.12319	0.61888	0.787815	0.661765	1.04835	0.586833

## Sheet: Figure5
Figure 5A
Left		Right
Con	CUMS	Con	CUMS
0.627935	1.63102	0.857893	1.83639
0.523711	2.60494	0.745021	2.27502
0.597958	2.03249	0.759622	1.80617
1.27424	2.90308	0.778654	1.90986
1.97615	2.13106	1.85881	0.890315
Figure 5B
Left		Right
Con	CUMS	Con	CUMS
0.665922	1.46139	1.12985	1.59417
0.70209	1.20167	1.29786	1.3687
1.10734	1.79456	1.04691	1.90898
1.0429	2.20132	1.03968	2.38855
1.48175	1.4094	0.828567	3.25579
Figure 5C
Con	CUMS
496	927
1439	496
938	912
710	1136
1385	1419
587	1260
473	818
970	1234
Figure 5E
Con	CUMS
1.14155	1.31045
1.10252	1.31949
0.938905	1.1694
0.947771	1.32989
0.869262	1.27533
Figure 5F
Con	CUMS
1.05033	1.50297
1.05117	1.72315
0.824547	1.5621
0.976911	1.87763
1.09704	1.22924

## Sheet: Figure6
Figure 6B					Figure 6C
Left		Right
Con	CUMS	Con	CUMS		Con	CUMS
1.05959	0.76966	1.3026	0.912034		0.934035	0.63152
0.913723	0.676139	0.825475	0.871921		1.19115	0.544005
0.869183	0.657117	0.871921	0.635468		0.875705	0.75805
1.08455	0.858768	1.07078	1.11127
1.07295	0.781173	0.929221	1.15582
Figure 6D	Left
Time(min)	Con								CUMS
0	5	5	4.3	8.9	3.4	5.3	5.6	7.1	5.2	5.2	4.9	7.1	4.1	4.2
15	22	24	25.6	22.1	24	25.4	15.7	27.4	23.7	17.3	20.4	18.8	16.6	21.4
30	30	28	28.2	28.9	29.9	27.6	14.6	22.3	23.7	27.2	26.2	21.9	14.9	23.6
60	27	19	10.6	12	10.3	11.2	11.3	12.2	23.4	21.9	17	14.6	9.9	13.3
90	17	11	5.2	8.5	6.2	9.3	8.1	8.3	11	14.3	12.2	11.9	8.6	9.6
120	12	8	1.9	6.6	4.6	7.9	5.9	6.2	11.2	10.3	9.7	9.6	6.7	8.14
Figure 6D	Right
Con			CUMS
Mean	SEM	N	Mean	SEM	N
1782	180.9	8	1723	153.4	8
Figure 6E	Left
Time (min)	Con								CUMS
0	8.1	8.4	4.2	7.3	7.7	8.3	6.1	6.6	7	4.5	6.7	7.7	10.1	7.8	9.1	8.9
15	5.9	4.9	3.7	4.8	6.4	4.1	3.2	2.9	6.6	7.1	5.3	7	8	5.3	6.6	7.8
30	5.2	4.2	2.7	3.8	5.3	3.7	3.7	4.4	6.1	6.7	4.4	6.2	9.1	3.7	4.8	6.8
60	5.4	4.8	3.3	4.6	4.3	2.9	4.1	4.1	7.1	5.6	5.5	7.5	8.6	3.2	4.6	8.4
90	5.1	7.3	3	4.6	4.4	4.3	4.6	4.6	6.2	3.4	6.2	7.2	9.3	3.2	4.9	7.4
120	5.2	5.7	2.9	4.8	4.7	5.3	6.6	6.5	6.2	3.4	7.5	8.3	7.9	3.8	7.4	7
Figure 6E	Middle
Con			CUMS
Mean	SEM	N	Mean	SEM	N
559.2	41.71	8	758.3	73.76	8
Figure 6E	Right
Con	CUMS
2.11274	0.39227
3.59331	-3.04012
0.845011	1.56267
2.79506	0.635401
1.23282	1.55396
4.70179	2.57611
4.30092	2.14136
5.48239	0.879517
