# Supplementary material for: Chronic unpredictable mild stress promotes atherosclerosis via adipose tissue dysfunction in ApoE-/- mice
Source: PeerJ journal article supplement (doi:10.7717/peerj.16029), 2023-09-04
Supplement: Supplemental_figure_2.pdf [file Supplemental_figure_2.pdf]

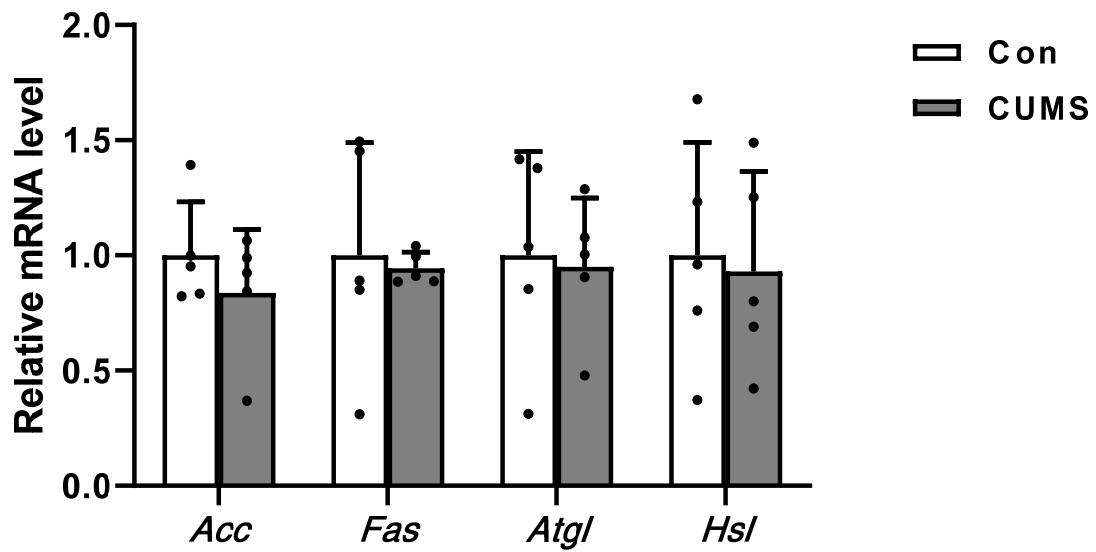

Supplemental Figure 2. Relative *Acc*, *Fas*, *Atgl*, and *Hsl* mRNA levels in eWAT in Con and CUMS groups. The data are presented as mean  $\pm$  SD; \**p* < 0.05, CUMS vs. Con; n = 5 per group.
