# Supplementary material for: Chronic unpredictable mild stress promotes atherosclerosis via adipose tissue dysfunction in ApoE-/- mice
Source: PeerJ journal article supplement (doi:10.7717/peerj.16029), 2023-09-04
Supplement: Supplemental_figure_3.pdf [file Supplemental_figure_3.pdf]

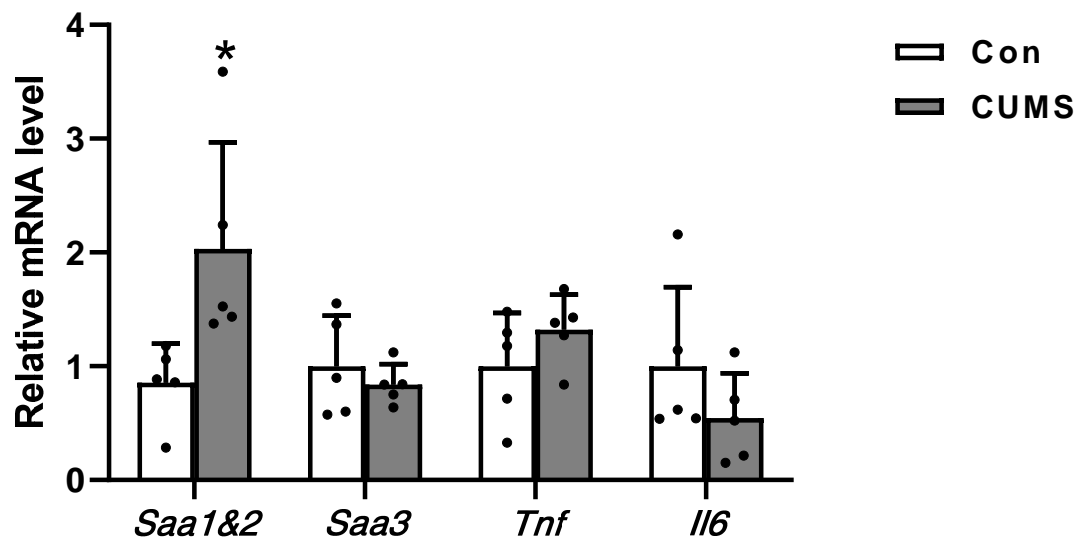

Supplemental Figure 3. Relative *Acc*, *Fas*, *Atgl*, and *Hsl* mRNA levels in eWAT in Con and CUMS groups. The data are presented as mean  $\pm$  SD; \* $p < 0.05$ , CUMS vs. Con;  $n = 5$  per group.
